# Supplementary material for: A pre-calibration approach to select optimum inputs for hydrological models in data-scarce regions
Source: Copernicus journal article supplement (doi:10.5194/hess-20-4391-2016), 2016-10-28
Supplement: Supplementary file 1 [file hess-20-4391-2016-supplement.zip]

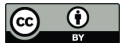

*Supplement of*

## **A pre-calibration approach to select optimum inputs for hydrological models in data-scarce regions**

**Esraa Tarawneh et al.**

*Correspondence to:* Esraa Tarawneh (esraatarawneh@yahoo.com)

- hess-20-4391-2016-supplement-title-page.pdf
- Wala catchment 30\_8\_16.mp4

The copyright of individual parts of the supplement might differ from the CC-BY 3.0 licence.
